# Supplementary material
Source: PubMed Central journal article supplement (PMC6814177)
Supplement: ao8b01712_si_001.pdf [file ao8b01712_si_001.pdf]

**Three novel mutations I65S, R66S and G86R divulges significant conformational variations  
in the PTB domain of IRS1 gene**

Praveen Chakravarthi Veeraragavulu,<sup>†</sup> Nanda Kumar Yellapu,<sup>†</sup> Sireesha Yerrathota,<sup>†</sup>  
Pradeepkiran Jangampalli Adi,<sup>\*,†,‡</sup> and Bhaskar Matcha<sup>\*,†</sup>

<sup>†</sup>*Division of Animal Biotechnology, Department of Zoology, Sri Venkateswara University,  
Tirupati, India, 517502*

<sup>‡</sup>*Garrison Institute on Aging, Texas Tech University Health Sciences Center, 3601 4th Street, MS  
9424, Lubbock, TX 79430, United States*

**\*Corresponding authors**

**Dr. Pradeepkiran Jangampalli Adi**

**Email:** pradeep.jangampalli@ttuhsc.edu

**Post-Doctoral Research Associate,** Garrison Institute on Aging,  
Texas Tech University of Health Science Centre, Lubbock, USA.

**Prof. M. Bhaskar**

**Email:** matchabhaskar2010@gmail.com

Division of Animal Biotechnology,  
Department of Zoology,  
Sri Venkateswara University,  
Tirupati, India.

### Supplementary Tables:

**Table S1:** Genetic analysis of IRS1 gene in type 2 diabetic patients showing the identified mutations and their reflection in amino acid changes.

| GenBank ID | Mutation | Codon Change | Amino acid change |
|------------|----------|--------------|-------------------|
| KF725072   | T-G      | ATC-AGC      | I65S              |
| KF725073   | G-C      | GGG-CGG      | G86R              |
| KF725074   | G-C      | AGG-AGC      | R66S              |

**Table S2:** PDBSum analysis of wild type and mutated IRS1 structures explaining the conformational variations due to mutations.

| IRS structure | Z-Rank score | Z-dock score (kcal/mol) | No Pi Interactions | No Hydrogen Bonds | Ligand Contact Surface Area (Å <sup>2</sup> ) | Receptor Contact Surface Area (Å <sup>2</sup> ) |
|---------------|--------------|-------------------------|--------------------|-------------------|-----------------------------------------------|-------------------------------------------------|
| Wild Type     | -110.73      | 15.72                   | 3                  | 10                | 623.36                                        | 625.47                                          |
| I65S          | -106.76      | 15.74                   | 2                  | 11                | 557.90                                        | 511.86                                          |
| R66S          | -111.94      | 20.30                   | 3                  | 12                | 887.66                                        | 929.33                                          |
| G86R          | -107.26      | 18.06                   | 3                  | 14                | 835.59                                        | 811.33                                          |

**Table S3:** Protein-protein docking of IRS1 wild type and mutated structures explaining affinity and bonding pattern variations against IR protein.

| <b>IRS structure</b> | <b>Z-Rank score</b> | <b>Z-dock score (kcal/mol)</b> | <b>No Pi Interactions</b> | <b>No Hydrogen Bonds</b> | <b>Ligand Contact Surface Area (Å<sup>2</sup>)</b> | <b>Receptor Contact Surface Area (Å<sup>2</sup>)</b> |
|----------------------|---------------------|--------------------------------|---------------------------|--------------------------|----------------------------------------------------|------------------------------------------------------|
| Wild Type            | -110.73             | 15.72                          | 3                         | 10                       | 623.36                                             | 625.47                                               |
| I65S                 | -106.76             | 15.74                          | 2                         | 11                       | 557.90                                             | 511.86                                               |
| R66S                 | -111.94             | 20.30                          | 3                         | 12                       | 887.66                                             | 929.33                                               |
| G86R                 | -107.26             | 18.06                          | 3                         | 14                       | 835.59                                             | 811.33                                               |

**Table S4:** Analysis of intermolecular interactions through Z-dock. The hydrogen bonds and pi-interactions formed between IR and IRS1-wild type and mutant models were shown.

| IRS1 Protein | Hydrogen bonds |               |              | Pi-interactions |               |              |
|--------------|----------------|---------------|--------------|-----------------|---------------|--------------|
|              | IR residues    | IRS1 residues | Distance (Å) | IR residues     | IRS1 residues | Distance (Å) |
| Wild Type    | ALA356         | ASN198        | 2.19         | TRP559          | MET156        | 5.40         |
|              | GLU355         | GLU200        | 2.31         | PHE518          | CYS186        | 4.04         |
|              | SER290         | GLN175        | 2.13         | PHE518          | PHE160        | 5.13         |
|              | SER290         | GLN175        | 2.58         |                 |               |              |
|              | SER619         | SER261        | 2.67         |                 |               |              |
|              | PHE518         | PRO158        | 2.31         |                 |               |              |
|              | SER290         | LYS171        | 1.83         |                 |               |              |
|              | GLU355         | SER199        | 2.19         |                 |               |              |
|              | PRO617         | SER261        | 2.74         |                 |               |              |
|              | PRO617         | SER261        | 2.39         |                 |               |              |
| I65S         | GLY623         | GLY174        | 2.24         | PRO307          | PHE264        | 5.28         |
|              | THR530         | GLN175        | 2.20         | TYR507          | LEU173        | 4.29         |
|              | THR516         | ARG213        | 1.38         |                 |               |              |
|              | ASP519         | GLY234        | 2.45         |                 |               |              |
|              | GLN521         | THR231        | 2.60         |                 |               |              |
|              | GLY623         | GLY174        | 2.84         |                 |               |              |

|      |        |        |      |        |        |      |
|------|--------|--------|------|--------|--------|------|
|      | THR516 | ARG213 | 2.78 |        |        |      |
|      | ASP519 | PRO233 | 1.94 |        |        |      |
|      | THR530 | PRO233 | 2.91 |        |        |      |
|      | GLY291 | PHE264 | 2.66 |        |        |      |
|      | GLY291 | PHE264 | 2.47 |        |        |      |
| R66S | ARG86  | SER217 | 2.54 | TYR91  | TRP237 | 4.45 |
|      | ARG118 | PRO170 | 2.69 | PHE88  | LYS169 | 4.78 |
|      | ARG118 | PRO170 | 2.04 | ARG118 | TRP237 | 5.05 |
|      | ASN348 | ALA159 | 1.90 |        |        |      |
|      | SER528 | PHE264 | 1.86 |        |        |      |
|      | GLN328 | TRP164 | 2.73 |        |        |      |
|      | GLN521 | LYS190 | 1.55 |        |        |      |
|      | PHE88  | TRP237 | 1.72 |        |        |      |
|      | GLY347 | PHE160 | 2.15 |        |        |      |
|      | ASN348 | LYS161 | 2.90 |        |        |      |
|      | GLU120 | GLY172 | 2.66 |        |        |      |
|      | GLN521 | LYS190 | 2.39 |        |        |      |
| G86R | ARG86  | ASP241 | 1.67 | PHE89  | GLU162 | 4.29 |
|      | ARG118 | GLN165 | 3.04 | PHE89  | TRP164 | 4.87 |
|      | GLN328 | CYS214 | 1.63 | PHE89  | TRP164 | 4.04 |
|      | ASN348 | ILE211 | 2.49 |        |        |      |
|      | PHE89  | GLN165 | 2.58 |        |        |      |
|      | PHE89  | GLN165 | 2.94 |        |        |      |
|      | GLN521 | ARG212 | 2.70 |        |        |      |

|  |        |        |      |  |  |  |
|--|--------|--------|------|--|--|--|
|  | CYS524 | SER228 | 2.82 |  |  |  |
|  | CYS524 | GLY232 | 2.64 |  |  |  |
|  | GLY347 | LEU208 | 2.09 |  |  |  |
|  | CYS524 | GLY232 | 2.11 |  |  |  |
|  | ALA523 | PRO233 | 2.91 |  |  |  |
|  | GLY525 | PRO233 | 2.10 |  |  |  |
|  | GLU329 | GLU251 | 2.51 |  |  |  |

## Supplementary Figures

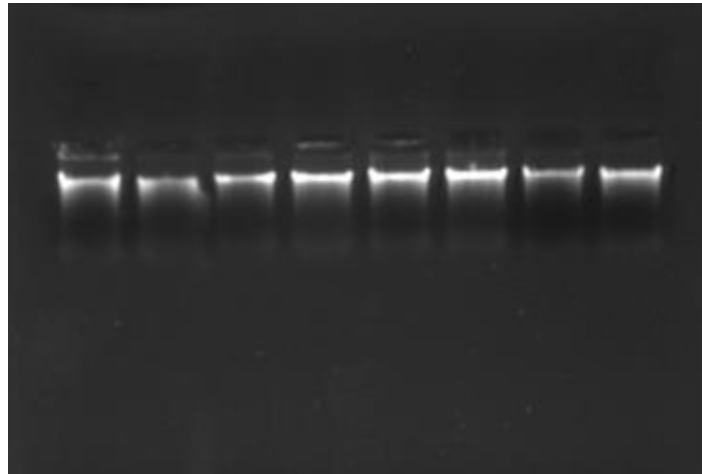

**Figure S1:** Agarose gel electrophoresis gel showing the genomic DNA isolated from normal controls and type 2 diabetic patients

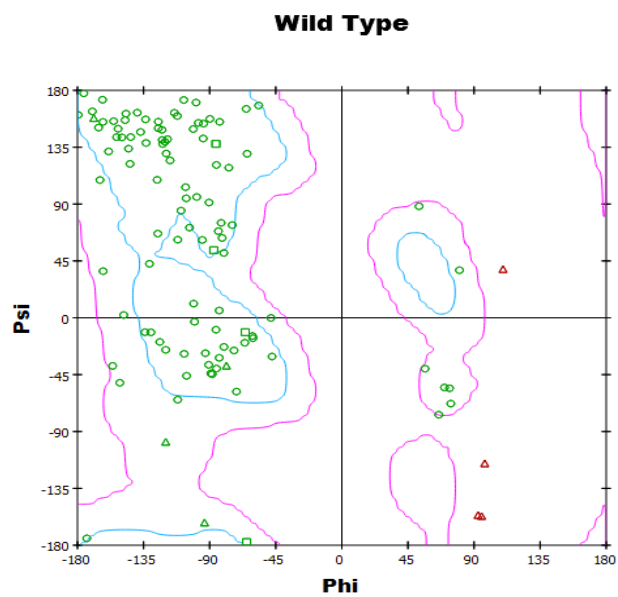

**Figure S2:** Ramachandran plot explaining the stereo chemical quality of molecular dynamics simulated wild type IRS1 structure.

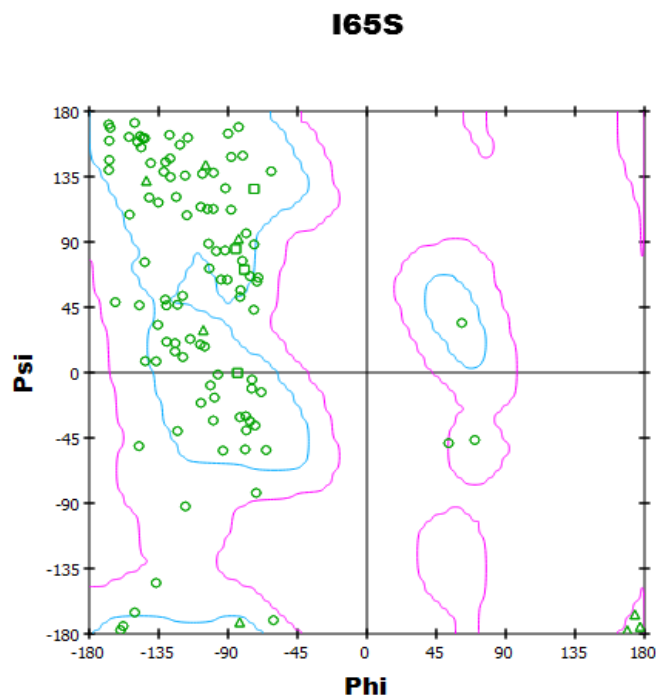

**Figure S3:** Ramachandran plot explaining the stereo chemical quality of molecular dynamics simulated I65S mutant IRS1 structure.

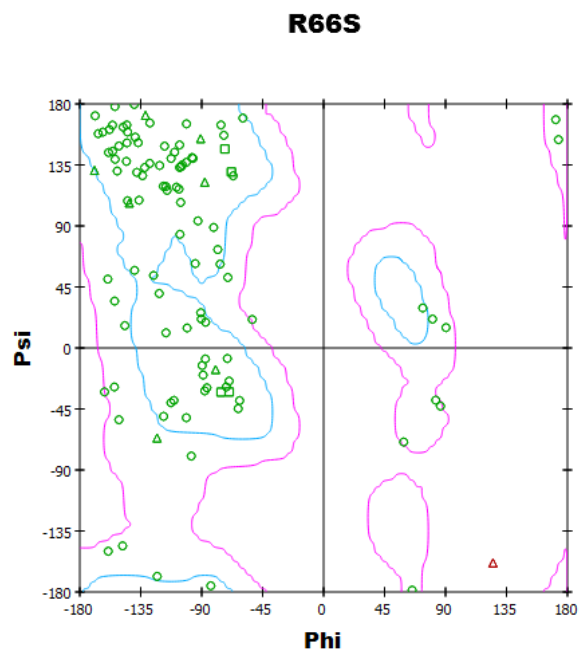

**Figure S4:** Ramachandran plot explaining the stereo chemical quality of molecular dynamics simulated R66S mutant IRS1 structure.



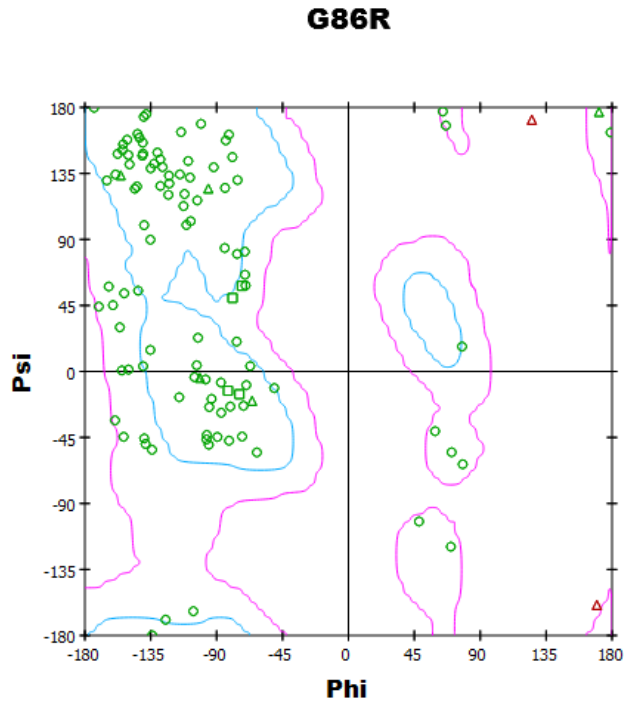

**Figure S5:** Ramachandran plot explaining the stereo chemical quality of molecular dynamics simulated G86R mutant IRS1 structure.

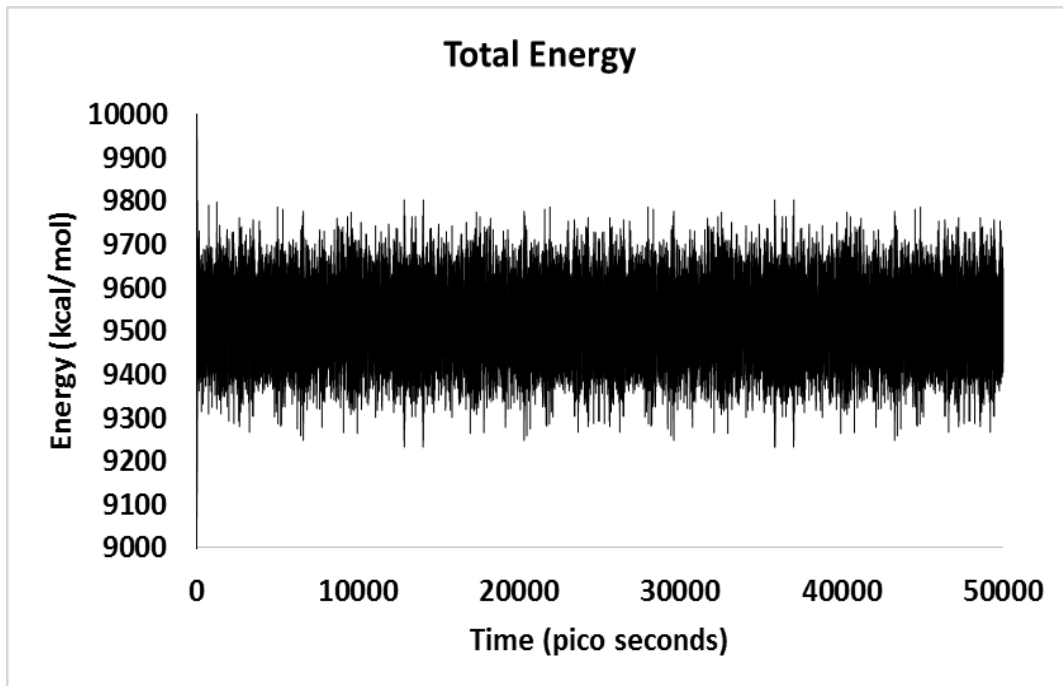

**Figure S6:** Total energy plot of Insulin receptor (IR) generated from 50000 ps molecular dynamics simulations showing the stabilised nature of energy at 9500 kcal/mol/.

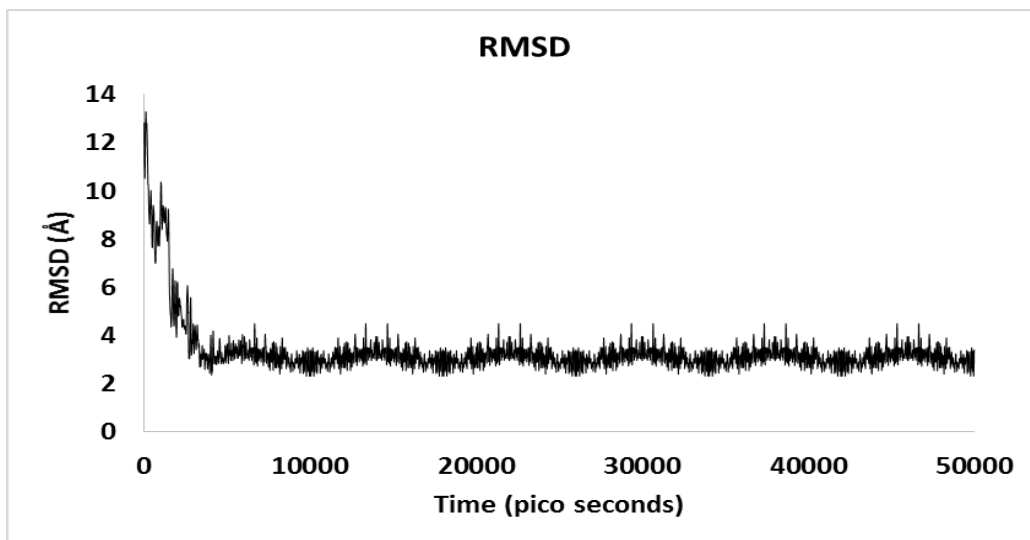

**Figure S7:** RMSD plot of Insulin receptor (IR) generated from 50000 ps molecular dynamics simulations showing the stabilized nature of RMSD at 3Å.
